# Supplementary material for: Vinardo: A Scoring Function Based on Autodock Vina Improves Scoring, Docking, and Virtual Screening
Source: PLoS One. 2016 May 12;11(5):e0155183. doi: 10.1371/journal.pone.0155183 (PMC4865195; doi:10.1371/journal.pone.0155183)
Supplement: S1 Table — Refer to Eqs 3 to 8 in the main text for a description of each parameter and weight. The following additional conditions were applied for atomic radii: C ≥ CA, N > O, and (N-O) ≤ 0.10 Å. (XLS) [file pone.0155183.s003.xls]

## Sheet: Sheet1
	Parameters					Weights					Atomic Radii
	o1	s1	p1	p2	h1	w1	w2	w3	w4	w5	C	CA	N	O
Initial Value	0	0.7	0	2.5	-0.8	-0.05	0	0.7	-0.045	-0.7	1.85	1.85	1.6	1.55
Final Value	0	1	0	3	-0.6	-0.03	0	0.9	-0.025	-0.5	2.05	2	1.8	1.75
Step Size	0.1	0.1	0.25	0.25	0.1	0.005	0	0.05	0.005	0.05	0.05	0.05	0.05	0.05
